# Supplementary material for: Effects of Light on Growth and Metabolism of Rhodococcus erythropolis
Source: MDPI journal article supplement (doi:10.3390/microorganisms10081680), 2022-08-20
Supplement: s1 [file s1]

# Effects of Light on Growth and Metabolism of *Rhodococcus erythropolis*

## Supplementals

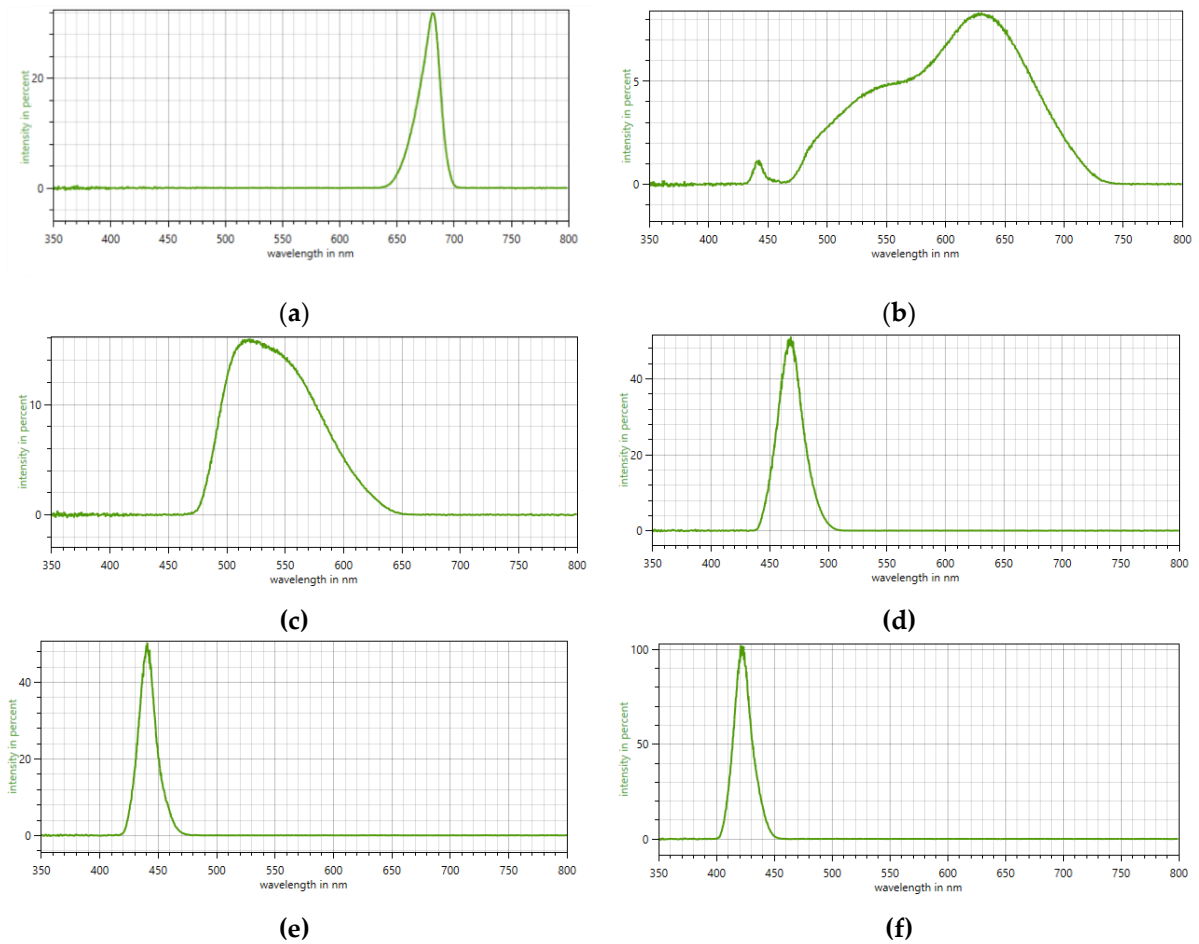

Figure S1: Spectrum of light (a) red light (680 nm) (b) white light (SWW) (c) green light (510 nm) (d) blue light (470 nm) (e) blue light (455 nm) (f) blue light (425 nm)

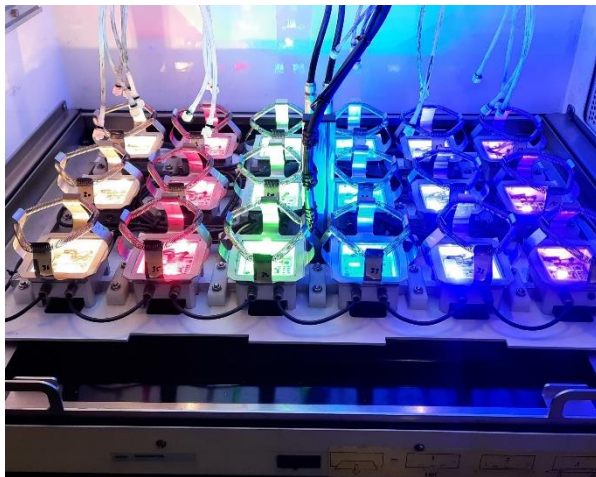

(a)

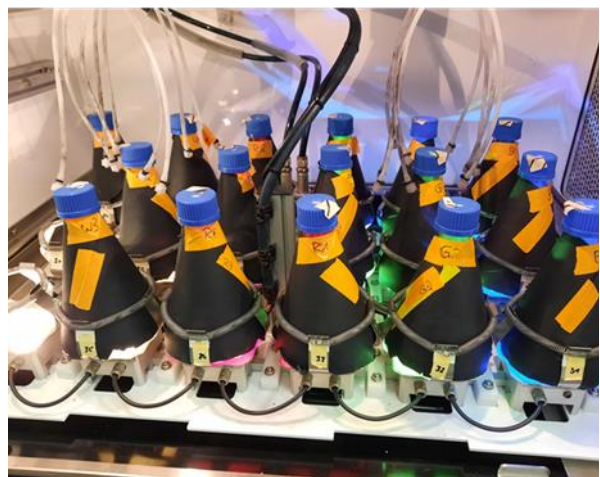

(b)

Figure S2. Customized shaking incubator (a)illumination setup with light of different wavelengths (b) shaded *R. erythropolis* cultures

Table S2. OD<sub>600nm</sub> of *R. erythropolis* at 236 W s<sup>-2</sup> irradiance with white, blue, green and red light illumination as well as dark conditions as control (D) (n=3).

**Setup 1**

| Time [h] |      | 0      | 17     | 24     | 40     | 48,5   | 65     | 72     | 89     | 96     | 113    | 122    |
|----------|------|--------|--------|--------|--------|--------|--------|--------|--------|--------|--------|--------|
| D        | 1    | 0,50   | 6,38   | 9,48   | 8,95   | 8,54   | 6,66   | 7,12   | 6,46   | 6,70   | 5,50   | 6,48   |
|          | 2    | 0,50   | 6,45   | 9,92   | 8,35   | 8,12   | 6,90   | 6,98   | 6,14   | 6,18   | 5,52   | 6,52   |
|          | 3    | 0,50   | 6,26   | 8,14   | 7,94   | 7,44   | 5,78   | 6,44   | 5,56   | 5,98   | 5,30   | 5,94   |
|          | Mean | 0,50   | 6,36   | 9,18   | 8,42   | 8,03   | 6,45   | 6,85   | 6,05   | 6,29   | 5,44   | 6,31   |
|          | SD   | 0,0000 | 0,0961 | 0,9271 | 0,5070 | 0,5551 | 0,5897 | 0,3591 | 0,4562 | 0,3717 | 0,1217 | 0,3239 |
| R        | 1    | 0,50   | 6,46   | 8,26   | 7,58   | 6,70   | 5,38   | 6,04   | 5,28   | 6,10   | 4,94   | 5,86   |
|          | 2    | 0,50   | 6,00   | 8,80   | 8,38   | 8,62   | 7,66   | 7,40   | 6,92   | 6,64   | 6,40   | 7,04   |
|          | 3    | 0,50   | 6,83   | 11,08  | 8,83   | 8,20   | 6,46   | 6,68   | 6,22   | 6,36   | 6,04   | 5,98   |
|          | Mean | 0,50   | 6,43   | 9,38   | 8,26   | 7,84   | 6,50   | 6,71   | 6,14   | 6,37   | 5,79   | 6,29   |
|          | SD   | 0,0000 | 0,4158 | 1,4968 | 0,6315 | 1,0094 | 1,1405 | 0,6804 | 0,8229 | 0,2701 | 0,7606 | 0,6494 |
| W        | 1    | 0,50   | 5,54   | 6,06   | 6,22   | 5,52   | 4,38   | 5,04   | 4,26   | 4,24   | 4,42   | 5,06   |
|          | 2    | 0,50   | 5,68   | 6,20   | 5,62   | 5,32   | 4,80   | 5,58   | 4,62   | 4,30   | 4,26   | 4,98   |
|          | 3    | 0,50   | 5,40   | 7,90   | 5,23   | 6,88   | 6,30   | 6,52   | 5,82   | 6,10   | 5,12   | 5,72   |
|          | Mean | 0,50   | 5,54   | 6,72   | 5,69   | 5,91   | 5,16   | 5,71   | 4,90   | 4,88   | 4,60   | 5,25   |
|          | SD   | 0,0000 | 0,1400 | 1,0243 | 0,4959 | 0,8488 | 1,0094 | 0,7490 | 0,8168 | 1,0570 | 0,4574 | 0,4061 |
| G        | 1    | 0,50   | 5,01   | 5,90   | 7,25   | 7,28   | 6,16   | 6,20   | 5,38   | 3,70   | 4,82   | 5,34   |
|          | 2    | 0,50   | 5,55   | 6,96   | 6,26   | 5,98   | 4,68   | 5,14   | 4,84   | 3,42   | 3,92   | 4,86   |
|          | 3    | 0,50   | 4,80   | 5,54   | 5,35   | 5,18   | 4,10   | 4,64   | 3,72   | 5,20   | 3,58   | 4,20   |
|          | Mean | 0,50   | 5,12   | 6,13   | 6,29   | 6,15   | 4,98   | 5,33   | 4,65   | 4,11   | 4,11   | 4,80   |
|          | SD   | 0,0000 | 0,3875 | 0,7382 | 0,9482 | 1,0599 | 1,0623 | 0,7966 | 0,8467 | 0,9571 | 0,6407 | 0,5724 |
| B455     | 1    | 0,50   | 3,27   | 4,70   | 4,82   | 4,80   | 3,66   | 4,40   | 3,74   | 2,78   | 3,78   | 4,12   |
|          | 2    | 0,50   | 3,27   | 4,06   | 3,70   | 5,46   | 3,14   | 4,12   | 3,92   | 3,64   | 3,70   | 4,02   |
|          | 3    | 0,50   | 3,54   | 4,74   | 4,85   | 4,78   | 3,82   | 4,08   | 3,48   | 4,88   | 3,68   | 4,10   |
|          | Mean | 0,50   | 3,36   | 4,50   | 4,46   | 5,01   | 3,54   | 4,20   | 3,71   | 3,77   | 3,72   | 4,08   |
|          | SD   | 0,0000 | 0,1559 | 0,3816 | 0,6583 | 0,3870 | 0,3555 | 0,1744 | 0,2212 | 1,0557 | 0,0529 | 0,0529 |

**Setup 2**

| Time [h] |      | 0    | 16   | 24   | 40   | 46   | 64   | 70   | 88   | 94   |
|----------|------|------|------|------|------|------|------|------|------|------|
| D        | 1    | 0,50 | 6,52 | 6,52 | 5,81 | 5,86 | 5,63 | 5,25 | 5,04 | 5,00 |
|          | 2    | 0,50 | 6,43 | 6,62 | 5,95 | 6,10 | 5,44 | 5,37 | 5,08 | 4,96 |
|          | 3    | 0,50 | 6,11 | 6,74 | 5,90 | 5,94 | 5,48 | 5,18 | 4,93 | 4,89 |
|          | Mean | 0,50 | 6,35 | 6,63 | 5,89 | 5,97 | 5,52 | 5,27 | 5,02 | 4,95 |

|      |      |        |        |        |        |        |        |        |        |        |
|------|------|--------|--------|--------|--------|--------|--------|--------|--------|--------|
|      | SD   | 0,0000 | 0,2155 | 0,1102 | 0,0709 | 0,1222 | 0,1002 | 0,0961 | 0,0777 | 0,0557 |
| R    | 1    | 0,50   | 6,45   | 6,42   | 5,58   | 5,66   | 5,24   | 5,11   | 4,72   | 5,02   |
|      | 2    | 0,50   | 6,37   | 6,55   | 5,57   | 5,96   | 5,27   | 5,20   | 4,56   | 4,95   |
|      | 3    | 0,50   | 6,42   | 6,45   | 5,55   | 5,79   | 5,24   | 5,10   | 4,62   | 4,99   |
|      | Mean | 0,50   | 6,41   | 6,47   | 5,57   | 5,80   | 5,25   | 5,14   | 4,63   | 4,99   |
|      | SD   | 0,0000 | 0,0404 | 0,0681 | 0,0153 | 0,1504 | 0,0173 | 0,0551 | 0,0808 | 0,0351 |
| W    | 1    | 0,50   | 5,49   | 6,25   | 5,80   | 5,77   | 5,19   | 5,02   | 4,55   | 4,70   |
|      | 2    | 0,50   | 5,61   | 6,36   | 5,54   | 5,66   | 5,24   | 4,93   | 4,47   | 4,75   |
|      | 3    | 0,50   | 5,75   | 6,38   | 5,68   | 5,76   | 5,20   | 4,91   | 4,37   | 4,58   |
|      | Mean | 0,50   | 5,62   | 6,33   | 5,67   | 5,73   | 5,21   | 4,95   | 4,46   | 4,68   |
|      | SD   | 0,0000 | 0,1301 | 0,0700 | 0,1301 | 0,0608 | 0,0265 | 0,0586 | 0,0902 | 0,0874 |
| G    | 1    | 0,50   | 5,10   | 5,83   | 5,83   | 5,52   | 5,16   | 4,85   | 4,19   | 4,57   |
|      | 2    | 0,50   | 5,38   | 5,93   | 5,57   | 5,56   | 5,00   | 4,90   | 4,29   | 4,70   |
|      | 3    | 0,50   | 5,31   | 6,08   | 5,80   | 5,78   | 5,20   | 4,94   | 4,26   | 4,57   |
|      | Mean | 0,50   | 5,26   | 5,95   | 5,73   | 5,62   | 5,12   | 4,90   | 4,25   | 4,61   |
|      | SD   | 0,0000 | 0,1457 | 0,1258 | 0,1422 | 0,1400 | 0,1058 | 0,0451 | 0,0513 | 0,0751 |
| B470 | 1    | 0,50   | 4,28   | 4,85   | 5,22   | 5,22   | 4,73   | 4,80   | 3,91   | 4,30   |
|      | 2    | 0,50   | 4,27   | 4,67   | 4,90   | 5,31   | 4,76   | 4,61   | 4,14   | 4,26   |
|      | 3    | 0,50   | 4,23   | 4,91   | 5,25   | 5,40   | 5,08   | 4,64   | 4,23   | 4,40   |
|      | Mean | 0,50   | 4,26   | 4,81   | 5,12   | 5,31   | 4,86   | 4,68   | 4,09   | 4,32   |
|      | SD   | 0,0000 | 0,0265 | 0,1249 | 0,1940 | 0,0900 | 0,1940 | 0,1021 | 0,1650 | 0,0721 |
| B455 | 1    | 0,50   | 3,26   | 3,79   | 3,99   | 3,98   | 3,85   | 3,72   | 3,37   | 3,46   |
|      | 2    | 0,50   | 3,06   | 3,40   | 4,40   | 4,16   | 3,93   | 3,76   | 3,51   | 3,61   |
|      | 3    | 0,50   | 3,06   | 3,44   | 3,81   | 3,95   | 3,73   | 3,69   | 3,56   | 3,52   |
|      | Mean | 0,50   | 3,13   | 3,54   | 4,07   | 4,03   | 3,84   | 3,72   | 3,48   | 3,53   |
|      | SD   | 0,0000 | 0,1155 | 0,2146 | 0,3024 | 0,1136 | 0,1007 | 0,0351 | 0,0985 | 0,0755 |
| B425 | 1    | 0,50   | 2,60   | 3,04   | 3,38   | 3,70   | 3,52   | 3,27   | 3,45   | 3,38   |
|      | 2    | 0,50   | 2,79   | 3,18   | 3,53   | 3,60   | 3,48   | 3,37   | 3,21   | 3,12   |
|      | 3    | 0,50   | 2,63   | 3,05   | 3,15   | 3,68   | 3,34   | 3,56   | 3,37   | 3,24   |
|      | Mean | 0,50   | 2,67   | 3,09   | 3,35   | 3,66   | 3,45   | 3,40   | 3,34   | 3,25   |
|      | SD   | 0,0000 | 0,1021 | 0,0781 | 0,1914 | 0,0529 | 0,0945 | 0,1473 | 0,1222 | 0,1301 |

Table S3. Dry cell weight (DCW) of *R. erythropolis* at 236 W s<sup>-2</sup> irradiance with white, blue, green and red light illumination as well as dark conditions as control (D) (n=3)

#### Setup 1

| 40 h |           |                    |                 |        |        |        |        |
|------|-----------|--------------------|-----------------|--------|--------|--------|--------|
|      | Empty [g] | Empty + Pellet [g] | Pellet only [g] | g/L    | Mean   | SD     | T-test |
| D    | 12,7007   | 12,7466            | 0,0459          | 1,8360 | 1,7960 | 0,0799 |        |
|      | 12,8596   | 12,9058            | 0,0462          | 1,8480 |        |        |        |
|      | 12,8159   | 12,8585            | 0,0426          | 1,7040 |        |        |        |

|            |         |         |        |        |        |        |            |
|------------|---------|---------|--------|--------|--------|--------|------------|
| <b>R</b>   | 12,7178 | 12,7593 | 0,0415 | 1,6600 | 1,7973 | 0,1191 | 0,98792272 |
|            | 12,6015 | 12,6483 | 0,0468 | 1,8720 |        |        |            |
|            | 12,8880 | 12,9345 | 0,0465 | 1,8600 |        |        |            |
| <b>W</b>   | 12,7287 | 12,7641 | 0,0354 | 1,4160 | 1,6173 | 0,3015 | 0,37731661 |
|            | 12,8112 | 12,8480 | 0,0368 | 1,4720 |        |        |            |
|            | 12,7894 | 12,8385 | 0,0491 | 1,9640 |        |        |            |
| <b>G</b>   | 12,8130 | 12,8528 | 0,0398 | 1,5920 | 1,4187 | 0,1701 | 0,02540509 |
|            | 12,8142 | 12,8495 | 0,0353 | 1,4120 |        |        |            |
|            | 12,8465 | 12,8778 | 0,0313 | 1,2520 |        |        |            |
| <b>455</b> | 12,8446 | 12,8639 | 0,0193 | 0,7720 | 1,0427 | 0,2783 | 0,01076795 |
|            | 12,8833 | 12,9165 | 0,0332 | 1,3280 |        |        |            |
|            | 12,8442 | 12,8699 | 0,0257 | 1,0280 |        |        |            |

|              |           |                    |                 |        |        |        |             |
|--------------|-----------|--------------------|-----------------|--------|--------|--------|-------------|
| <b>122 h</b> |           |                    |                 |        |        |        |             |
|              | Empty [g] | Empty + Pellet [g] | Pellet only [g] | g/L    | Mean   | SD     | T-test      |
| <b>D</b>     | 12,8383   | 12,8884            | 0,0501          | 2,0040 | 1,996  | 0,0883 |             |
|              | 12,8599   | 12,9075            | 0,0476          | 1,9040 |        |        |             |
|              | 12,6842   | 12,7362            | 0,0520          | 2,0800 |        |        |             |
| <b>R</b>     | 12,5771   | 12,6224            | 0,0453          | 1,8120 | 2,096  | 0,2527 | 0,552840152 |
|              | 12,9807   | 13,0352            | 0,0545          | 2,1800 |        |        |             |
|              | 12,9072   | 12,9646            | 0,0574          | 2,2960 |        |        |             |
| <b>W</b>     | 12,5792   | 12,6139            | 0,0347          | 1,3880 | 1,7067 | 0,3444 | 0,231451611 |
|              | 12,7395   | 12,7810            | 0,0415          | 1,6600 |        |        |             |
|              | 12,7107   | 12,7625            | 0,0518          | 2,0720 |        |        |             |
| <b>G</b>     | 12,8406   | 12,8836            | 0,0430          | 1,7200 | 1,5480 | 0,2321 | 0,035362144 |
|              | 12,5807   | 12,6217            | 0,0410          | 1,6400 |        |        |             |
|              | 12,6632   | 12,6953            | 0,0321          | 1,2840 |        |        |             |
| <b>455</b>   | 12,8255   | 12,8504            | 0,0249          | 0,9960 | 1,0213 | 0,0510 | 7,78355E-05 |
|              | 12,8223   | 12,8493            | 0,0270          | 1,0800 |        |        |             |
|              | 12,8788   | 12,9035            | 0,0247          | 0,9880 |        |        |             |

Setup 2

|             |
|-------------|
| <b>40 h</b> |
|-------------|

|          | Empty [g] | Empty + Pellet [g] | Pellet only [g] | g/L    | Mean   | SD     | T-test |
|----------|-----------|--------------------|-----------------|--------|--------|--------|--------|
| <b>D</b> | 12,8550   | 12,9005            | 0,0455          | 1,8200 | 1,8013 | 0,0257 |        |
|          | 12,6895   | 12,7348            | 0,0453          | 1,8120 |        |        |        |
|          | 12,7066   | 12,7509            | 0,0443          | 1,7720 |        |        |        |

|          |         |         |        |        |        |        |            |
|----------|---------|---------|--------|--------|--------|--------|------------|
| <b>R</b> | 12,8340 | 12,8788 | 0,0448 | 1,7920 | 1,7680 | 0,0262 | 0,19111057 |
|          | 12,8588 | 12,9023 | 0,0435 | 1,7400 |        |        |            |
|          | 12,8473 | 12,8916 | 0,0443 | 1,7720 |        |        |            |

|          |         |         |        |        |        |        |            |
|----------|---------|---------|--------|--------|--------|--------|------------|
| <b>W</b> | 12,6699 | 12,7147 | 0,0448 | 1,7920 | 1,7827 | 0,0349 | 0,49758532 |
|          | 12,8908 | 12,9344 | 0,0436 | 1,7440 |        |        |            |
|          | 12,7791 | 12,8244 | 0,0453 | 1,8120 |        |        |            |

|          |         |         |        |        |        |        |            |
|----------|---------|---------|--------|--------|--------|--------|------------|
| <b>G</b> | 12,8210 | 12,8681 | 0,0471 | 1,8840 | 1,8453 | 0,0335 | 0,14573179 |
|          | 12,8181 | 12,8638 | 0,0457 | 1,8280 |        |        |            |
|          | 12,5686 | 12,6142 | 0,0456 | 1,8240 |        |        |            |

|            |         |         |        |        |        |        |            |
|------------|---------|---------|--------|--------|--------|--------|------------|
| <b>425</b> | 12,8141 | 12,8473 | 0,0332 | 1,3280 | 1,2747 | 0,0855 | 0,00051804 |
|            | 12,8712 | 12,9042 | 0,033  | 1,3200 |        |        |            |
|            | 12,8050 | 12,8344 | 0,0294 | 1,1760 |        |        |            |

|            |         |         |        |        |        |        |            |
|------------|---------|---------|--------|--------|--------|--------|------------|
| <b>455</b> | 12,7994 | 12,8320 | 0,0326 | 1,3040 | 1,3520 | 0,0550 | 0,00021339 |
|            | 12,8877 | 12,9230 | 0,0353 | 1,4120 |        |        |            |
|            | 12,8210 | 12,8545 | 0,0335 | 1,3400 |        |        |            |

|            |         |         |        |        |        |        |            |
|------------|---------|---------|--------|--------|--------|--------|------------|
| <b>470</b> | 12,5756 | 12,6193 | 0,0437 | 1,7480 | 1,6760 | 0,0741 | 0,05041872 |
|            | 12,6226 | 12,6626 | 0,0400 | 1,6000 |        |        |            |
|            | 12,5980 | 12,6400 | 0,0420 | 1,6800 |        |        |            |

|          | <b>94 h</b> |                    |                 |        |        |        |        |
|----------|-------------|--------------------|-----------------|--------|--------|--------|--------|
|          | Empty [g]   | Empty + Pellet [g] | Pellet only [g] | g/L    | Mean   | SD     | T-test |
| <b>D</b> | 12,5978     | 12,6718            | 0,0740          | 1,6444 | 1,6563 | 0,0413 |        |
|          | 12,5894     | 12,6660            | 0,0766          | 1,7022 |        |        |        |
|          | 12,5980     | 12,6710            | 0,0730          | 1,6222 |        |        |        |

|          |         |         |        |        |        |        |             |
|----------|---------|---------|--------|--------|--------|--------|-------------|
| <b>R</b> | 12,8525 | 12,9266 | 0,0741 | 1,6467 | 1,6481 | 0,0013 | 0,749851349 |
|          | 12,8202 | 12,8944 | 0,0742 | 1,6489 |        |        |             |
|          | 12,8335 | 12,9077 | 0,0742 | 1,6489 |        |        |             |

|          |         |         |        |        |        |        |             |
|----------|---------|---------|--------|--------|--------|--------|-------------|
| <b>W</b> | 12,8419 | 12,9114 | 0,0695 | 1,5444 | 1,5963 | 0,0449 | 0,163687851 |
|          | 12,7139 | 12,7869 | 0,0730 | 1,6222 |        |        |             |
|          | 12,8086 | 12,8816 | 0,0730 | 1,6222 |        |        |             |

|          |         |         |        |        |        |        |             |
|----------|---------|---------|--------|--------|--------|--------|-------------|
| <b>G</b> | 12,5752 | 12,6436 | 0,0684 | 1,5200 | 1,5237 | 0,0084 | 0,005508964 |
|          | 12,8405 | 12,9088 | 0,0683 | 1,5178 |        |        |             |

|            |         |         |        |        |        |        |             |
|------------|---------|---------|--------|--------|--------|--------|-------------|
|            | 12,8670 | 12,9360 | 0,0690 | 1,5333 |        |        |             |
| <b>425</b> | 12,8456 | 12,8945 | 0,0489 | 1,0867 | 1,0711 | 0,0214 | 2,62675E-05 |
|            | 12,8749 | 12,9235 | 0,0486 | 1,0800 |        |        |             |
|            | 12,8964 | 12,9435 | 0,0471 | 1,0467 |        |        |             |
| <b>455</b> | 12,8379 | 12,8837 | 0,0458 | 1,0178 | 1,0644 | 0,0404 | 5,93447E-05 |
|            | 12,7062 | 12,7552 | 0,0490 | 1,0889 |        |        |             |
|            | 12,5879 | 12,6368 | 0,0489 | 1,0867 |        |        |             |
| <b>470</b> | 12,8980 | 12,9641 | 0,0661 | 1,4689 | 1,4644 | 0,0044 | 0,001323559 |
|            | 12,6905 | 12,7564 | 0,0659 | 1,4644 |        |        |             |
|            | 12,6994 | 12,7651 | 0,0657 | 1,4600 |        |        |             |

Table S4. Carotenoid accumulation of *R. erythropolis* at 236 W s<sup>-2</sup> irradiance with white, blue, green and red light illumination as well as dark conditions as control (D) (n=3)

#### Setup 1

| 40 h       |          |                      |                                         |            |            |            |
|------------|----------|----------------------|-----------------------------------------|------------|------------|------------|
|            | DCW [mg] | Abs <sub>454nm</sub> | Abs <sub>454nm</sub> /mg <sub>DCW</sub> | Mean       | SD         | T-test     |
| <b>D</b>   | 16       | 0,157                | 0,0098125                               | 0,00965936 | 0,00056629 |            |
|            | 15,5     | 0,14                 | 0,009032258                             |            |            |            |
|            | 15       | 0,152                | 0,010133333                             |            |            |            |
| <b>R</b>   | 15       | 0,139                | 0,009266667                             | 0,00927083 | 0,00046043 | 0,408684   |
|            | 16       | 0,141                | 0,0088125                               |            |            |            |
|            | 15       | 0,146                | 0,009733333                             |            |            |            |
| <b>W</b>   | 15       | 0,163                | 0,010866667                             | 0,01219211 | 0,00115701 | 0,02713917 |
|            | 15,5     | 0,197                | 0,012709677                             |            |            |            |
|            | 15       | 0,195                | 0,013                                   |            |            |            |
| <b>G</b>   | 15       | 0,211                | 0,014066667                             | 0,0145371  | 0,00041615 | 0,00027445 |
|            | 16       | 0,235                | 0,0146875                               |            |            |            |
|            | 14       | 0,208                | 0,014857143                             |            |            |            |
| <b>455</b> | 15,5     | 0,113                | 0,007290323                             | 0,00809677 | 0,00081942 | 0,05314016 |
|            | 14       | 0,125                | 0,008928571                             |            |            |            |
|            | 14       | 0,113                | 0,008071429                             |            |            |            |

#### 122 h

|            | DCW<br>[mg] | Abs <sub>454nm</sub> | Abs <sub>454nm</sub> /mg <sub>DCW</sub> | Mean       | SD         | T-test     |
|------------|-------------|----------------------|-----------------------------------------|------------|------------|------------|
| <b>D</b>   | 15          | 0,182                | 0,012133333                             | 0,01273799 | 0,00069679 |            |
|            | 15,5        | 0,195                | 0,012580645                             |            |            |            |
|            | 14          | 0,189                | 0,0135                                  |            |            |            |
| <b>R</b>   | 15          | 0,149                | 0,009933333                             | 0,01079444 | 0,0012275  | 0,07558031 |
|            | 15          | 0,183                | 0,0122                                  |            |            |            |
|            | 16          | 0,164                | 0,01025                                 |            |            |            |
| <b>W</b>   | 15          | 0,178                | 0,011866667                             | 0,01170046 | 0,00054011 | 0,11114665 |
|            | 15,5        | 0,172                | 0,011096774                             |            |            |            |
|            | 14,5        | 0,176                | 0,012137931                             |            |            |            |
| <b>G</b>   | 15          | 0,195                | 0,013                                   | 0,01164887 | 0,00249103 | 0,50623322 |
|            | 15,5        | 0,136                | 0,008774194                             |            |            |            |
|            | 14,5        | 0,191                | 0,013172414                             |            |            |            |
| <b>455</b> | 14,5        | 0,077                | 0,005310345                             | 0,00539751 | 0,00048153 | 0,00011475 |
|            | 14,5        | 0,072                | 0,004965517                             |            |            |            |
|            | 12          | 0,071                | 0,005916667                             |            |            |            |

## Setup 2

|            | 40 h        |                      |                                         |            |            |            |
|------------|-------------|----------------------|-----------------------------------------|------------|------------|------------|
|            | DCW<br>[mg] | Abs <sub>454nm</sub> | Abs <sub>454nm</sub> /mg <sub>DCW</sub> | Mean       | SD         | T-test     |
| <b>D</b>   | 15,1        | 0,128                | 0,008476821                             | 0,00845661 | 0,00021194 | -          |
|            | 14,9        | 0,129                | 0,008657718                             |            |            |            |
|            | 15,3        | 0,126                | 0,008235294                             |            |            |            |
| <b>R</b>   | 14          | 0,111                | 0,007928571                             | 0,00853164 | 0,00066528 | 0,86141635 |
|            | 15,9        | 0,147                | 0,009245283                             |            |            |            |
|            | 15,2        | 0,128                | 0,008421053                             |            |            |            |
| <b>W</b>   | 14,1        | 0,137                | 0,009716312                             | 0,01086662 | 0,00120471 | 0,02696424 |
|            | 15,1        | 0,183                | 0,012119205                             |            |            |            |
|            | 15,7        | 0,169                | 0,010764331                             |            |            |            |
| <b>G</b>   | 13,9        | 0,171                | 0,012302158                             | 0,01298628 | 0,0010712  | 0,00198779 |
|            | 15,4        | 0,219                | 0,014220779                             |            |            |            |
|            | 15,6        | 0,194                | 0,012435897                             |            |            |            |
| <b>425</b> | 14,2        | 0,142                | 0,01                                    | 0,00928114 | 0,00093641 | 0,21109544 |

|  |      |       |             |  |  |  |
|--|------|-------|-------------|--|--|--|
|  | 13,2 | 0,127 | 0,009621212 |  |  |  |
|  | 13,5 | 0,111 | 0,008222222 |  |  |  |

|            |      |       |             |            |            |            |
|------------|------|-------|-------------|------------|------------|------------|
| <b>455</b> | 15,2 | 0,103 | 0,006776316 | 0,00704363 | 0,00034012 | 0,00363883 |
|            | 13,6 | 0,101 | 0,007426471 |            |            |            |
|            | 15,3 | 0,106 | 0,006928105 |            |            |            |

|            |      |       |             |            |            |            |
|------------|------|-------|-------------|------------|------------|------------|
| <b>470</b> | 14,3 | 0,216 | 0,015104895 | 0,01596651 | 0,00087648 | 0,00013425 |
|            | 14   | 0,236 | 0,016857143 |            |            |            |
|            | 16   | 0,255 | 0,0159375   |            |            |            |

| <b>94 h</b> |             |                      |                                         |            |            |        |
|-------------|-------------|----------------------|-----------------------------------------|------------|------------|--------|
|             | DCW<br>[mg] | Abs <sub>454nm</sub> | Abs <sub>454nm</sub> /mg <sub>DCW</sub> | Mean       | SD         | T-test |
| <b>D</b>    | 15,1        | 0,112                | 0,007417219                             | 0,00742067 | 0,00046877 | -      |
|             | 14,7        | 0,116                | 0,007891156                             |            |            |        |
|             | 15,1        | 0,105                | 0,006953642                             |            |            |        |

|          |      |       |             |            |            |            |
|----------|------|-------|-------------|------------|------------|------------|
| <b>R</b> | 15,2 | 0,115 | 0,007565789 | 0,00765663 | 0,00020128 | 0,46795091 |
|          | 14,2 | 0,112 | 0,007887324 |            |            |            |
|          | 14,9 | 0,112 | 0,007516779 |            |            |            |

|          |      |       |             |            |            |            |
|----------|------|-------|-------------|------------|------------|------------|
| <b>W</b> | 14,3 | 0,158 | 0,011048951 | 0,01113713 | 0,00052504 | 0,00079337 |
|          | 13,6 | 0,145 | 0,010661765 |            |            |            |
|          | 14,7 | 0,172 | 0,01170068  |            |            |            |

|          |      |       |             |            |            |            |
|----------|------|-------|-------------|------------|------------|------------|
| <b>G</b> | 15,9 | 0,16  | 0,010062893 | 0,01003411 | 0,00053642 | 0,00314346 |
|          | 14,4 | 0,152 | 0,010555556 |            |            |            |
|          | 15,5 | 0,147 | 0,009483871 |            |            |            |

|            |      |       |             |            |            |            |
|------------|------|-------|-------------|------------|------------|------------|
| <b>425</b> | 15   | 0,063 | 0,0042      | 0,00445458 | 0,00030233 | 0,00077216 |
|            | 14,2 | 0,068 | 0,004788732 |            |            |            |
|            | 16   | 0,07  | 0,004375    |            |            |            |

|            |      |       |             |            |            |            |
|------------|------|-------|-------------|------------|------------|------------|
| <b>455</b> | 14,5 | 0,061 | 0,004206897 | 0,00399575 | 0,00019462 | 0,00030645 |
|            | 13,6 | 0,052 | 0,003823529 |            |            |            |
|            | 13,9 | 0,055 | 0,003956835 |            |            |            |

|            |      |       |             |            |            |            |
|------------|------|-------|-------------|------------|------------|------------|
| <b>470</b> | 14,2 | 0,143 | 0,010070423 | 0,01072982 | 0,00063331 | 0,00189736 |
|            | 15   | 0,17  | 0,011333333 |            |            |            |
|            | 14   | 0,151 | 0,010785714 |            |            |            |



Table S5. Fatty acid profile of *R. erythropolis* at 236 W s<sup>-2</sup> irradiance with white, blue, green and red light illumination as well as dark conditions as control (n=3) in µg mg<sup>-1</sup>DCW.

**Setup 1**

| 40 h             |            |            |            |            |            |
|------------------|------------|------------|------------|------------|------------|
| Fatty acid       | Dark       | Red680     | WhiteSWW   | Green510   | Blue455    |
| C13:0            | n.d.       | 0.06±0.1   | 0.43±0.03  | 0.22±0.05  | n.d.       |
| C14:0            | 4.34±0.04  | 4.54±0.11  | 3.82±0.1   | 3.59±0.16  | 3.27±0.13  |
| C14:1            | 0.66±0.06  | 0.63±0.14  | 0.37±0.03  | 0.41±0.06  | 0.21±0.2   |
| C15:0            | 1.52±0.04  | 1.52±0.02  | 3.53±0.04  | 4.15±0.2   | 0.78±0.07  |
| C16:0            | 9.24±0.13  | 9.9±0.18   | 8.24±0.18  | 8.18±0.13  | 12.27±0.34 |
| C16:1            | 9.46±0.06  | 9.15±0.45  | 6.75±0.08  | 6.62±0.18  | 5.98±0.35  |
| C17:00           | 0.38±0.03  | 0.41±0.03  | 0.7±0.05   | 0.96±0.13  | 0.64±0.05  |
| C17:1            | 2.1±0.04   | 2.04±0.05  | 2.68±0.12  | 2.86±0.13  | 0.97±0.05  |
| C18:0            | 0.24±0.08  | 0.17±0.17  | 0.05±0.09  | 0.68±0.8   | 0.32±0.1   |
| C18:1 (oleat)    | 2±0.05     | 2.02±0.04  | 0.77±0.01  | 0.8±0.11   | 1.46±0.08  |
| C18:1 (vaccenat) | 17.04±0.12 | 16.98±0.27 | 13.62±0.19 | 13.83±0.37 | 15.33±0.1  |
| C18:2            | n.d.       | n.d.       | n.d.       | n.d.       | n.d.       |
| C18:3            | 2.33±0.03  | 2.46±0.04  | 2.72±0.12  | 2.89±0.25  | 1.59±0.12  |
| C19:00           | n.d.       | n.d.       | n.d.       | 0.18±0.31  | n.d.       |
| C20:0            | n.d.       | n.d.       | 0.25±0.03  | 0.27±0.03  | n.d.       |
| C20:1            | 0.37±0.02  | 0.38±0.02  | 0.36±0.02  | 0.35±0.01  | 0.31±0.03  |
| C20:2            | n.d.       | n.d.       | n.d.       | n.d.       | 0.07±0.12  |
| C20:3            | 3.6±0.03   | 4.24±0.12  | 2.99±0.17  | 3.31±0.46  | 3.65±0.39  |
| C20:4            | n.d.       | n.d.       | n.d.       | n.d.       | n.d.       |
| C20:5            | 0.88±0.06  | 0.89±0.06  | 0.75±0.05  | 0.45±0.21  | 0.39±0.14  |
| C22:0            | n.d.       | n.d.       | n.d.       | n.d.       | n.d.       |
| C22:1            | 0.34±0.01  | 0.39±0.01  | 0.54±0.05  | 0.72±0.09  | 0.37±0.1   |
| C22:6            | n.d.       | n.d.       | n.d.       | n.d.       | n.d.       |
| C24:0            | 1.13±0.04  | 1.13±0.03  | 0.81±0.06  | 0.62±0.37  | 0.56±0.01  |

  

| 122 h            |            |            |           |            |            |
|------------------|------------|------------|-----------|------------|------------|
| Fatty acid       | Dark       | Red680     | WhiteSWW  | Green510   | Blue455    |
| C13:0            | 0.06±0.11  | n.d.       | 0.12±0.2  | 0.28±0.09  | n.d.       |
| C14:0            | 4.18±0.08  | 4.07±0.05  | 3.76±0.16 | 3.74±0.14  | 3.42±0.61  |
| C14:1            | 0.65±0.06  | 0.57±0.07  | 0.42±0.05 | 0.44±0.06  | 0.23±0.21  |
| C15:0            | 1.42±0.04  | 1.39±0.04  | 3.43±0.07 | 4.04±0.5   | 0.93±0.08  |
| C16:0            | 9.07±0.2   | 9.08±0.15  | 8.66±0.4  | 9±0.3      | 14.7±0.21  |
| C16:1            | 9.75±0.25  | 8.93±0.21  | 7.54±0.34 | 7.48±0.18  | 6.9±0.45   |
| C17:00           | 0.35±0     | 0.43±0.09  | 0.75±0.03 | 0.93±0.11  | 0.81±0.07  |
| C17:1            | 1.92±0.04  | 2±0.34     | 2.91±0.21 | 3.25±0.32  | 1.23±0.07  |
| C18:0            | 0.11±0.1   | n.d.       | 0.14±0.13 | 0.38±0.3   | 0.31±0.05  |
| C18:1 (oleat)    | 2.06±0.03  | 1.62±0.67  | 0.85±0.06 | 0.83±0.08  | 1.72±0.27  |
| C18:1 (vaccenat) | 17.31±0.27 | 16.75±0.52 | 15.1±0.54 | 15.85±0.72 | 19.58±0.59 |
| C18:2            | n.d.       | n.d.       | n.d.      | n.d.       | n.d.       |
| C18:3            | 2.24±0.01  | 2.26±0.05  | 2.86±0.12 | 3.07±0.23  | 2.17±0.14  |

|        |           |           |           |           |           |
|--------|-----------|-----------|-----------|-----------|-----------|
| C19:00 | 0.05±0.08 | n.d.      | n.d.      | 0.09±0.15 | n.d.      |
| C20:0  | n.d.      | n.d.      | n.d.      | n.d.      | n.d.      |
| C20:1  | 0.35±0.01 | 0.31±0.05 | 0.36±0.02 | 0.36±0.02 | 0.38±0.03 |
| C20:2  | n.d.      | n.d.      | n.d.      | n.d.      | n.d.      |
| C20:3  | 3.63±0.06 | 4.14±0.24 | 3.35±0.15 | 3.61±0.25 | 5.28±0.55 |
| C20:4  | n.d.      | n.d.      | n.d.      | n.d.      | n.d.      |
| C20:5  | 0.9±0.04  | 0.88±0.03 | 0.84±0.08 | 0.72±0.23 | 0.89±0.21 |
| C22:0  | n.d.      | n.d.      | n.d.      | n.d.      | n.d.      |
| C22:1  | 0.34±0.02 | 0.44±0.12 | 0.62±0.03 | 0.8±0.06  | 0.43±0.23 |
| C22:6  | n.d.      | n.d.      | n.d.      | n.d.      | n.d.      |
| C24:0  | 1.16±0.04 | 1.13±0.05 | 0.93±0.07 | 0.87±0.01 | 0.44±0.2  |

### Setup 2

|                  | 40 h       |            |            |            |            |            |            |
|------------------|------------|------------|------------|------------|------------|------------|------------|
|                  | Dark       | Red680     | WhiteSWW   | Green510   | Blue470    | Blue455    | Blue425    |
| C13:0            | 0.16±0.04  | 0.11±0.15  | 0.38±0.02  | 0.39±0.02  | n.d.       | n.d.       | n.d.       |
| C14:0            | 4.01±0.11  | 4.01±0.05  | 3.49±0.09  | 3.3±0.03   | 2.39±0.82  | 2.8±0.14   | 3.43±0.14  |
| C14:1            | 0.62±0.09  | 0.54±0.02  | 0.4±0.06   | 0.33±0     | 0.25±0.06  | 0.25±0.06  | 0.16±0.14  |
| C15:0            | 1.49±0.07  | 1.44±0.02  | 3.51±0.04  | 3.98±0.14  | 1.01±0.11  | 0.76±0.06  | 0.89±0.01  |
| C16:0            | 8.5±0.34   | 8.96±0.47  | 7.95±0.22  | 7.74±0.12  | 11.51±0.25 | 11.62±0.19 | 12.06±0.16 |
| C16:1            | 8.28±0.09  | 8.31±0.07  | 7.05±0.1   | 6.64±0.09  | 6.12±0.13  | 5.57±0.14  | 6.05±0.09  |
| C17:00           | 0.34±0.01  | 0.37±0     | 0.68±0.01  | 0.77±0.03  | 0.8±0      | 0.59±0.01  | 0.47±0.03  |
| C17:1            | 1.77±0.03  | 1.8±0.04   | 2.85±0.08  | 3.1±0.06   | 1.41±0.02  | 0.93±0.03  | 1.02±0.04  |
| C18:0            | 0.13±0.01  | 0.06±0.09  | 0.05±0.08  | 0.13±0.02  | 0.24±0.02  | 0.25±0.01  | 0.23±0.02  |
| C18:1 (oleat)    | 3.01±0.12  | 2.81±0.11  | 0.93±0.05  | 0.8±0.02   | 1.06±0.04  | 1.47±0.01  | 1.44±0.07  |
| C18:1 (vaccenat) | 14.42±0.45 | 14.64±0.07 | 13.85±0.39 | 13.67±0.17 | 16.79±0.32 | 14.95±0.27 | 14.9±0.17  |
| C18:2            | n.d.       | n.d.       | n.d.       | n.d.       | 0.08±0.14  | n.d.       | n.d.       |
| C18:3            | 1.93±0.09  | 1.94±0.02  | 2.38±0.12  | 2.48±0.08  | 1.29±0.33  | 1.48±0.16  | 1.81±0.03  |
| C19:00           | 0.04±0.07  | 0.07±0.1   | n.d.       | n.d.       | n.d.       | n.d.       | n.d.       |
| C20:0            | n.d.       | n.d.       | 0.21±0.01  | 0.27±0.02  | 0.07±0.12  | n.d.       | n.d.       |
| C20:1            | 0.27±0.01  | 0.28±0     | 0.31±0.02  | 0.33±0.01  | 0.23±0.01  | 0.24±0.01  | 0.29±0.02  |
| C20:2            | n.d.       |
| C20:3            | 2.9±0.06   | 3.38±0.05  | 2.58±0.07  | 2.6±0.06   | 3.06±0.03  | 3.51±0.1   | 4.16±0.06  |
| C20:4            | n.d.       | n.d.       | n.d.       | 0.09±0.08  | n.d.       | n.d.       | n.d.       |
| C20:5            | 0.83±0.04  | 0.76±0.06  | 0.69±0.06  | 0.68±0.05  | 0.2±0.04   | 0.22±0.07  | 0.55±0.07  |
| C22:0            | n.d.       |
| C22:1            | 0.25±0     | 0.32±0.02  | 0.37±0.01  | 0.47±0.02  | 0.44±0.06  | 0.38±0.02  | 0.37±0.01  |
| C22:6            | n.d.       | n.d.       | 0.07±0.11  | n.d.       | n.d.       | n.d.       | n.d.       |
| C24:0            | 1.02±0.05  | 1.14±0.1   | 0.84±0.05  | 0.82±0.03  | 0.58±0.14  | 0.62±0.01  | 0.78±0.06  |

|       | 94 h      |           |           |           |            |           |            |
|-------|-----------|-----------|-----------|-----------|------------|-----------|------------|
|       | Dark      | Red680    | WhiteSWW  | Green510  | Blue470    | Blue455   | Blue425    |
| C13:0 | 0.06±0.11 | 0.08±0.11 | 0.26±0.17 | 0.32±0.17 | n.d.       | 0.07±0.06 | 0.13±0.03  |
| C14:0 | 3.85±0.12 | 3.52±0.31 | 3.17±0.66 | 3.22±0.24 | 2.53±0.45  | 3.22±0.04 | 3.72±0.13  |
| C14:1 | 0.51±0.21 | 0.56±0.18 | 0.4±0.05  | 0.4±0.03  | 0.33±0.03  | 0.34±0.02 | 0.42±0.04  |
| C15:0 | 1.46±0.03 | 1.42±0.08 | 3.63±0.09 | 4.04±0.12 | 1.09±0.05  | 0.92±0.1  | 1.07±0.14  |
| C16:0 | 8.61±0.01 | 8.66±0    | 8.66±0.03 | 8.29±0.13 | 12.24±0.31 | 13.8±0.17 | 13.78±0.45 |

|                  |            |            |            |           |            |            |            |
|------------------|------------|------------|------------|-----------|------------|------------|------------|
| C16:1            | 9.58±0.07  | 9.3±0.1    | 8.28±0.18  | 7.55±0.04 | 6.23±0.19  | 6.24±0.16  | 6.38±0.15  |
| C17:00           | 0.36±0.02  | 0.37±0.01  | 0.73±0.02  | 0.79±0.02 | 0.89±0.02  | 0.68±0.01  | 0.54±0.02  |
| C17:1            | 1.77±0     | 1.74±0.02  | 3.21±0.13  | 3.35±0.03 | 1.68±0.06  | 1.15±0.03  | 1.23±0.04  |
| C18:0            | 0.04±0.07  | 0.13±0     | 0.13±0.01  | 0.13±0.01 | 0.23±0     | 0.27±0.03  | 0.23±0.05  |
| C18:1 (oleat)    | 3.27±0.13  | 2.93±0.15  | 1.11±0.05  | 0.83±0.04 | 0.91±0.1   | 1.57±0.05  | 1.4±0.02   |
| C18:1 (vaccenat) | 15.37±0.08 | 15.09±0.08 | 15.99±0.48 | 15.1±0.25 | 18.09±0.62 | 17.93±0.26 | 17.33±0.43 |
| C18:2            | n.d.       | n.d.       | 0.34±0.59  | n.d.      | n.d.       | n.d.       | n.d.       |
| C18:3            | 1.99±0.12  | 2.14±0.05  | 2.67±0.28  | 2.71±0.06 | 1.02±0.1   | 1.77±0.14  | 2.24±0.06  |
| C19:00           | 0.14±0.02  | 0.14±0     | 0.14±0.01  | 0.09±0.08 | n.d.       | 0.03±0.05  | n.d.       |
| C20:0            | n.d.       | n.d.       | 0.09±0.08  | 0.25±0.04 | n.d.       | n.d.       | n.d.       |
| C20:1            | 0.28±0.02  | 0.29±0.01  | 0.35±0.01  | 0.32±0.02 | 0.23±0     | 0.27±0.01  | 0.36±0.01  |
| C20:2            | n.d.       | n.d.       | 0.2±0.34   | n.d.      | n.d.       | n.d.       | n.d.       |
| C20:3            | 3.2±0.03   | 3.52±0.1   | 3.1±0.03   | 2.88±0.13 | 3.3±0.14   | 4.32±0.06  | 4.87±0.14  |
| C20:4            | n.d.       | n.d.       | n.d.       | n.d.      | n.d.       | n.d.       | n.d.       |
| C20:5            | 0.95±0.02  | 0.87±0.04  | 0.67±0.17  | 0.76±0.07 | 0.29±0.15  | 0.37±0.16  | 0.13±0.04  |
| C22:0            | n.d.       | n.d.       | n.d.       | n.d.      | 0.04±0.07  | 0.08±0.07  | n.d.       |
| C22:1            | 0.28±0.02  | 0.33±0.01  | 0.49±0.03  | 0.53±0.04 | 0.27±0.24  | 0.37±0.22  | 0.5±0.04   |
| C22:6            | n.d.       | n.d.       | n.d.       | n.d.      | n.d.       | n.d.       | n.d.       |
| C24:0            | 1.24±0.05  | 1.18±0.01  | 1.18±0.23  | 0.93±0.04 | 0.25±0.18  | 0.19±0.02  | 0.25±0.02  |

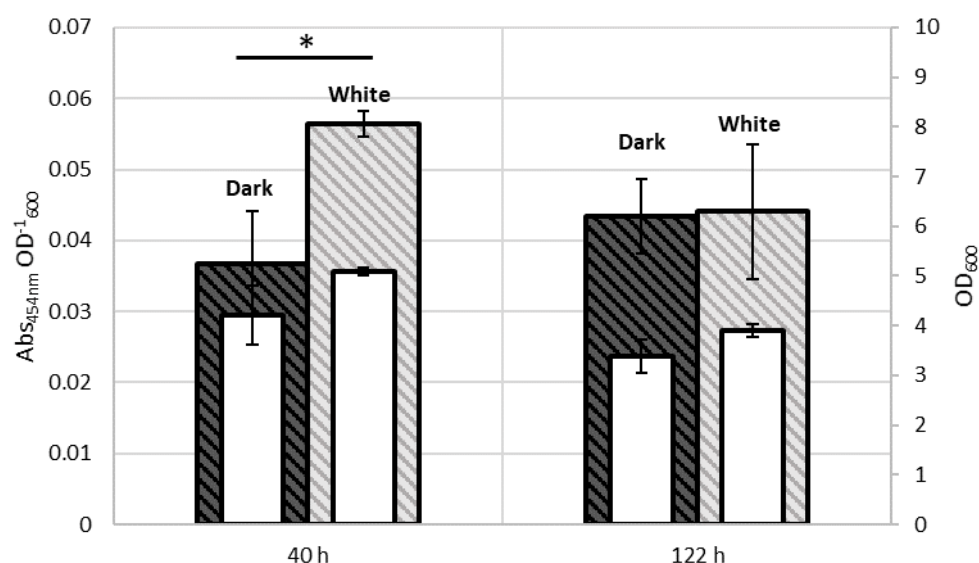

Figure S3. Carotenoid accumulation of proteomic samples normalized on the OD<sub>600nm</sub> of *R. erythropolis* grown under white light LEDs as well as dark conditions as control, \*  $p < 0.05$  ( $n=3$ ). Absorbance measured at 454 nm. (a) OD<sub>600nm</sub> and carotenoid level after 40 h (b) OD<sub>600nm</sub> and carotenoid level after 122 h.

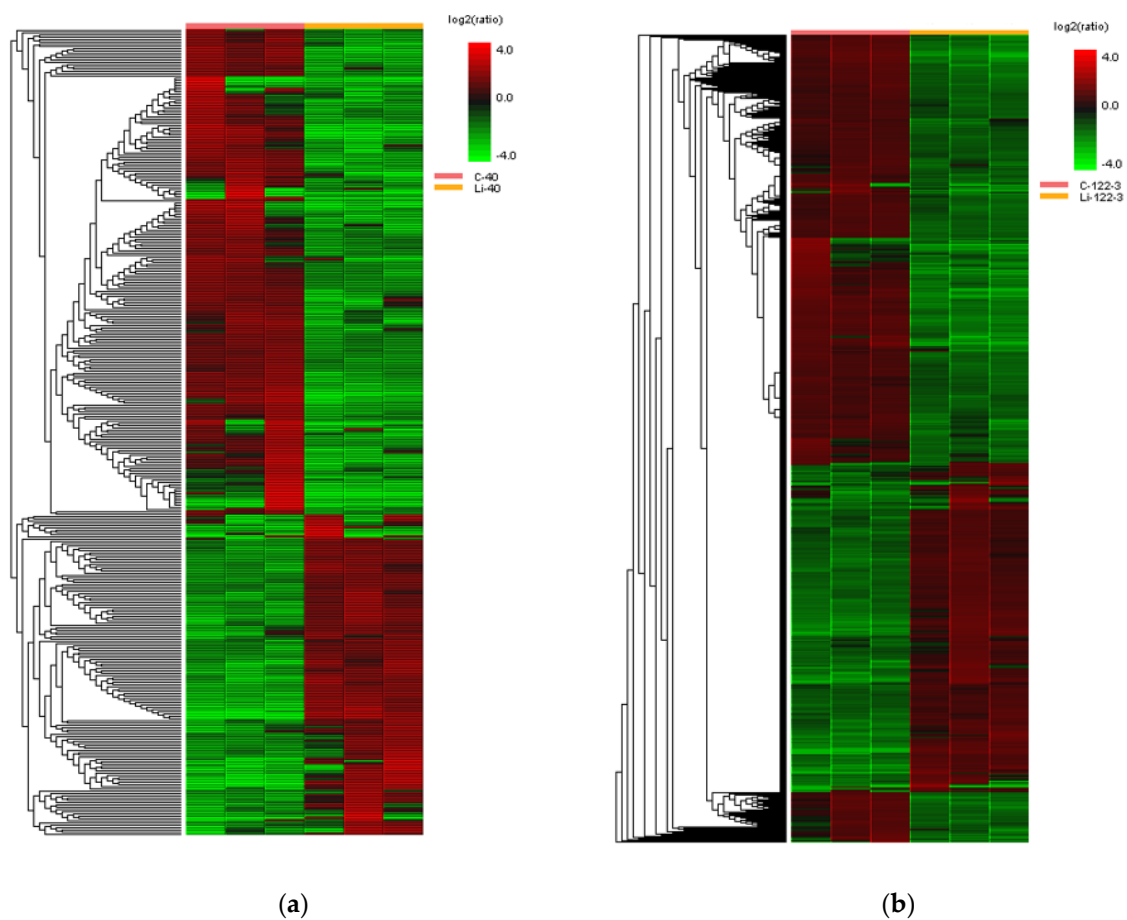

Figure S4. Heat map of the proteins quantified between samples grown under LED light compared to dark conditions as control with significantly different abundance (Significance and fold change  $\geq 2$ ). All downregulated proteins are marked in green while upregulated proteins are marked in red. (a) Heat map after 40 h. (b) Heat map after 122 h. Figure compiled by PEAKS Studio Xpro. High resolution figures are provided as separate files (Figure S4a.png and Figure S4b.png).
